# Supplementary figures and images for: The Defined TLR3 Agonist, Nexavant, Exhibits Anti-Cancer Efficacy and Potentiates Anti-PD-1 Antibody Therapy by Enhancing Immune Cell Infiltration
Source: MDPI journal article supplement (doi:10.3390/cancers15245752), 2023-12-08

Figure 1B

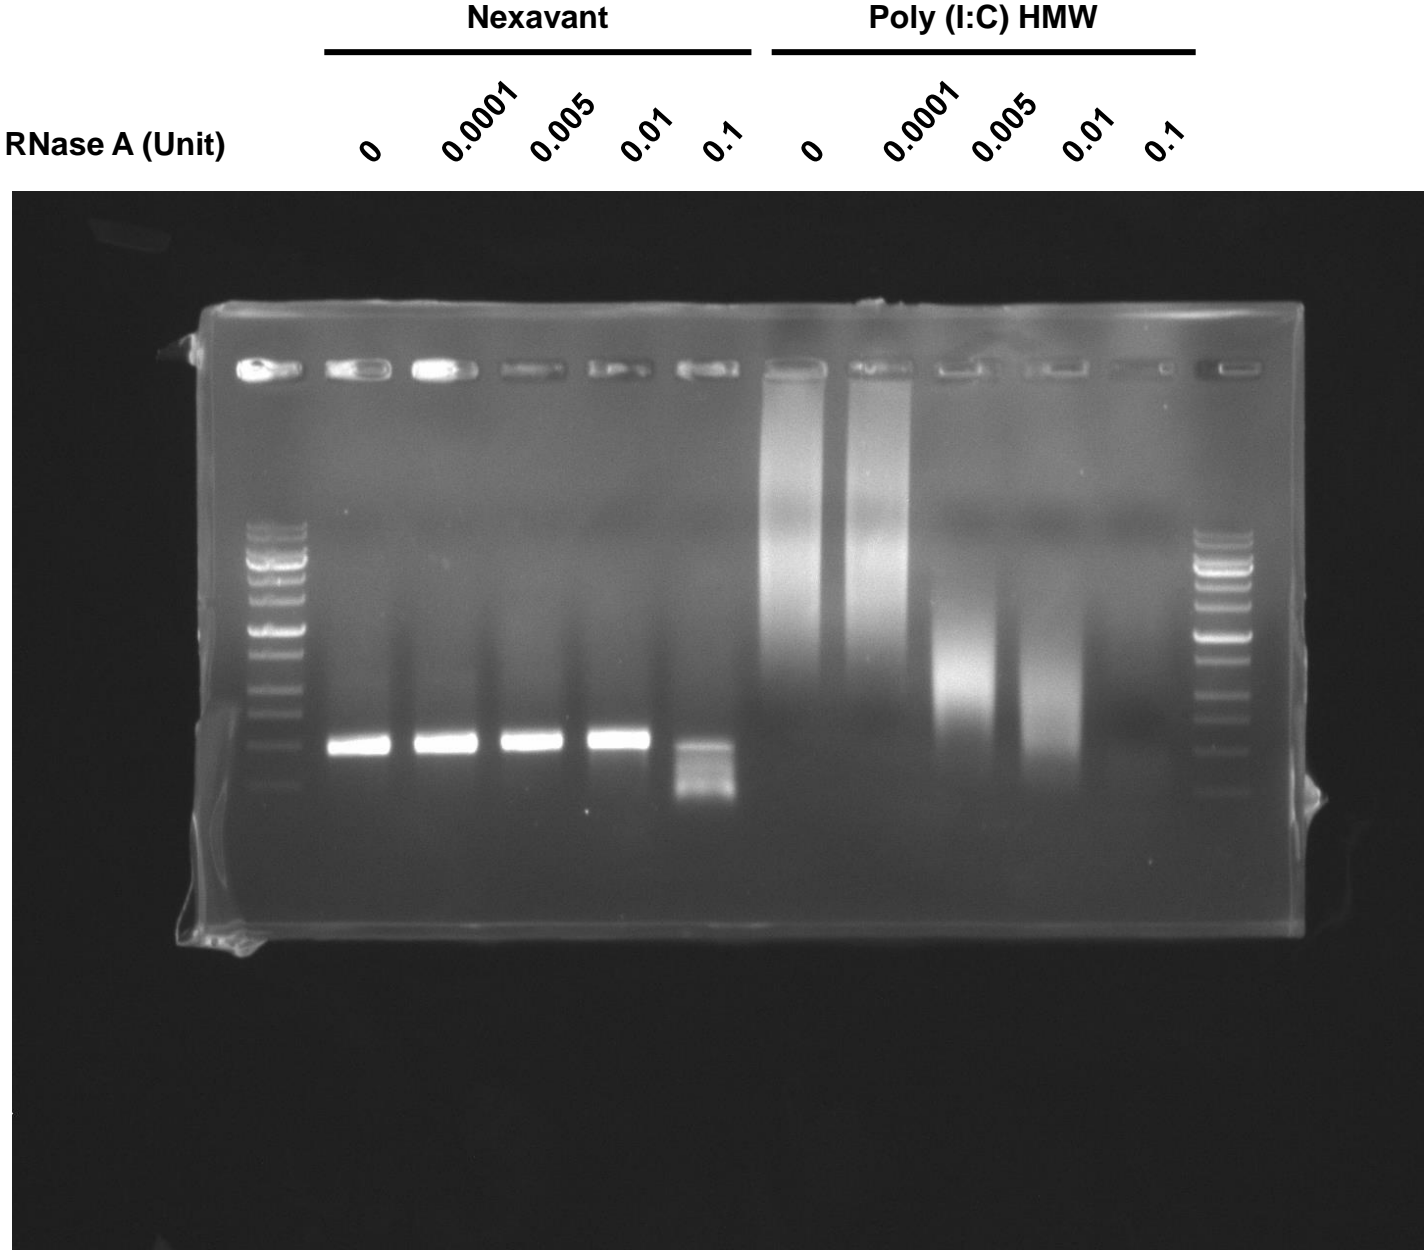

Figure 1C

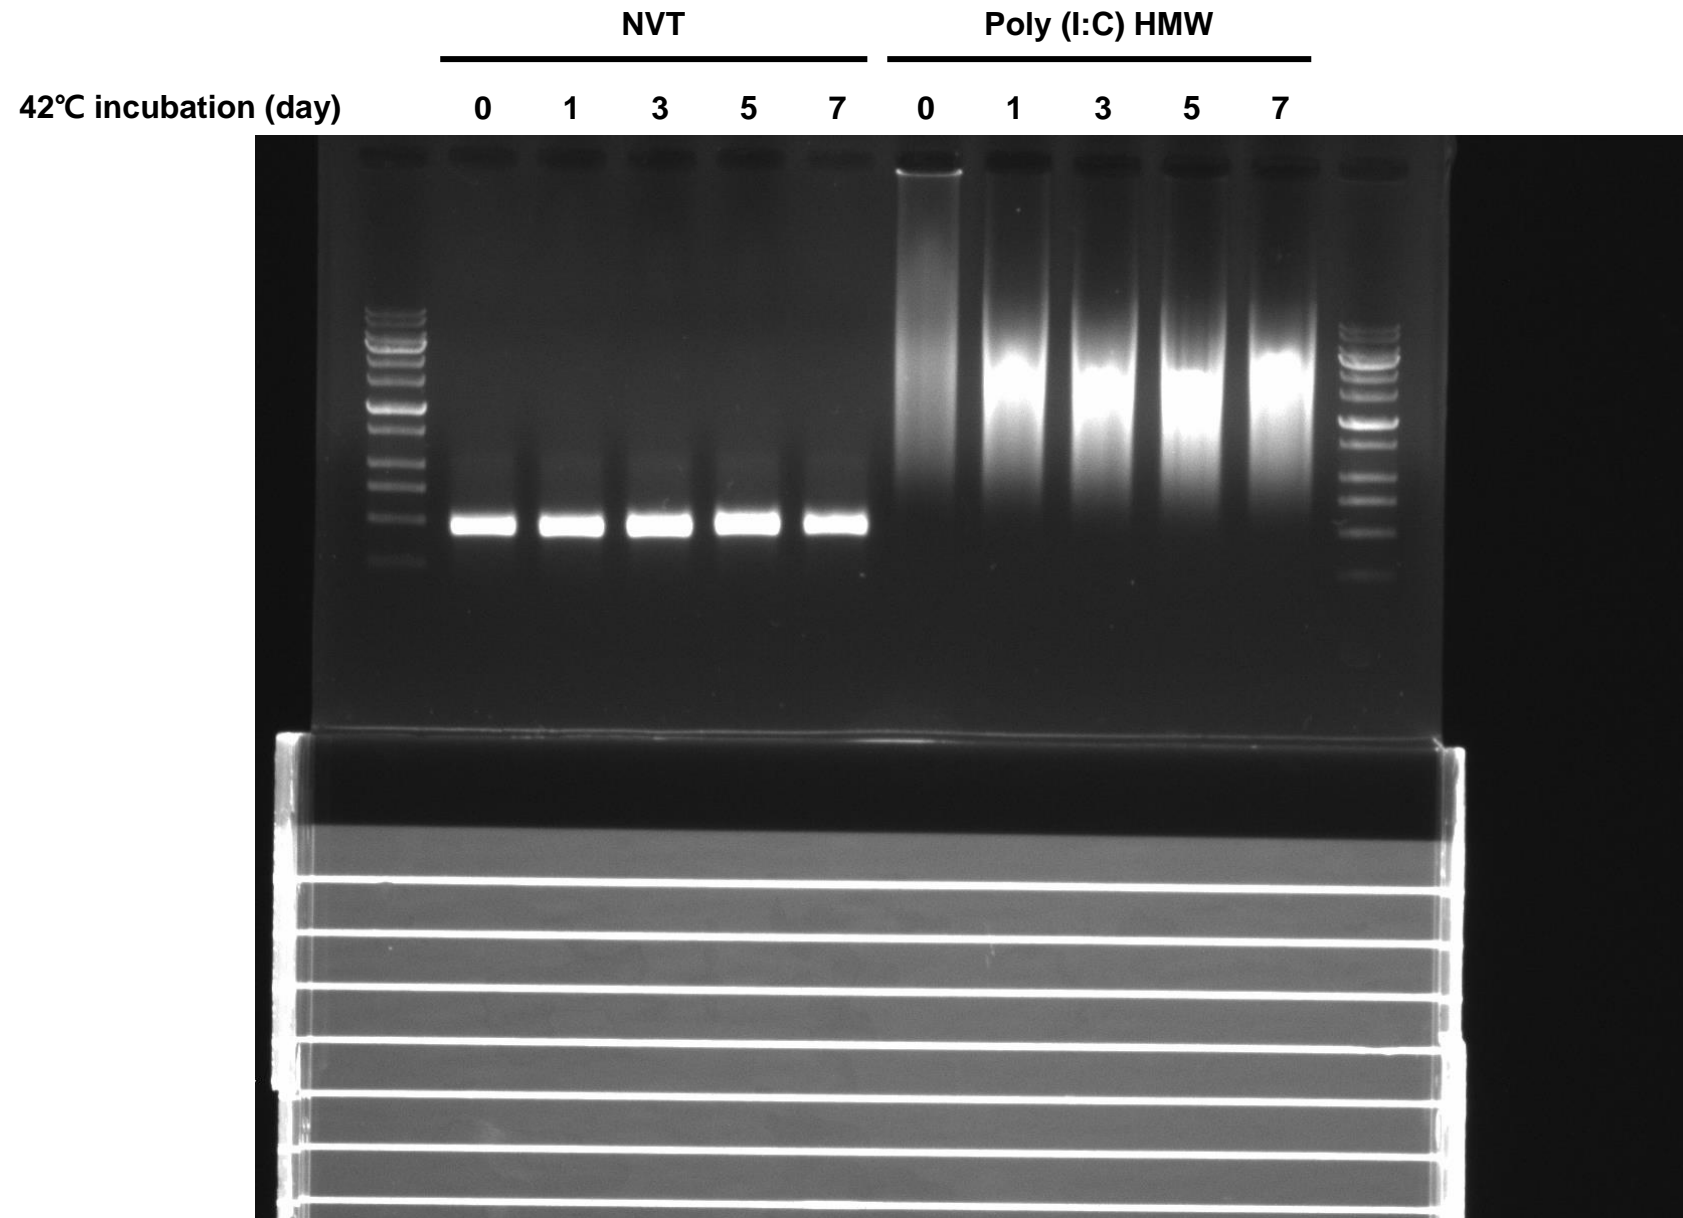

Figure 7B

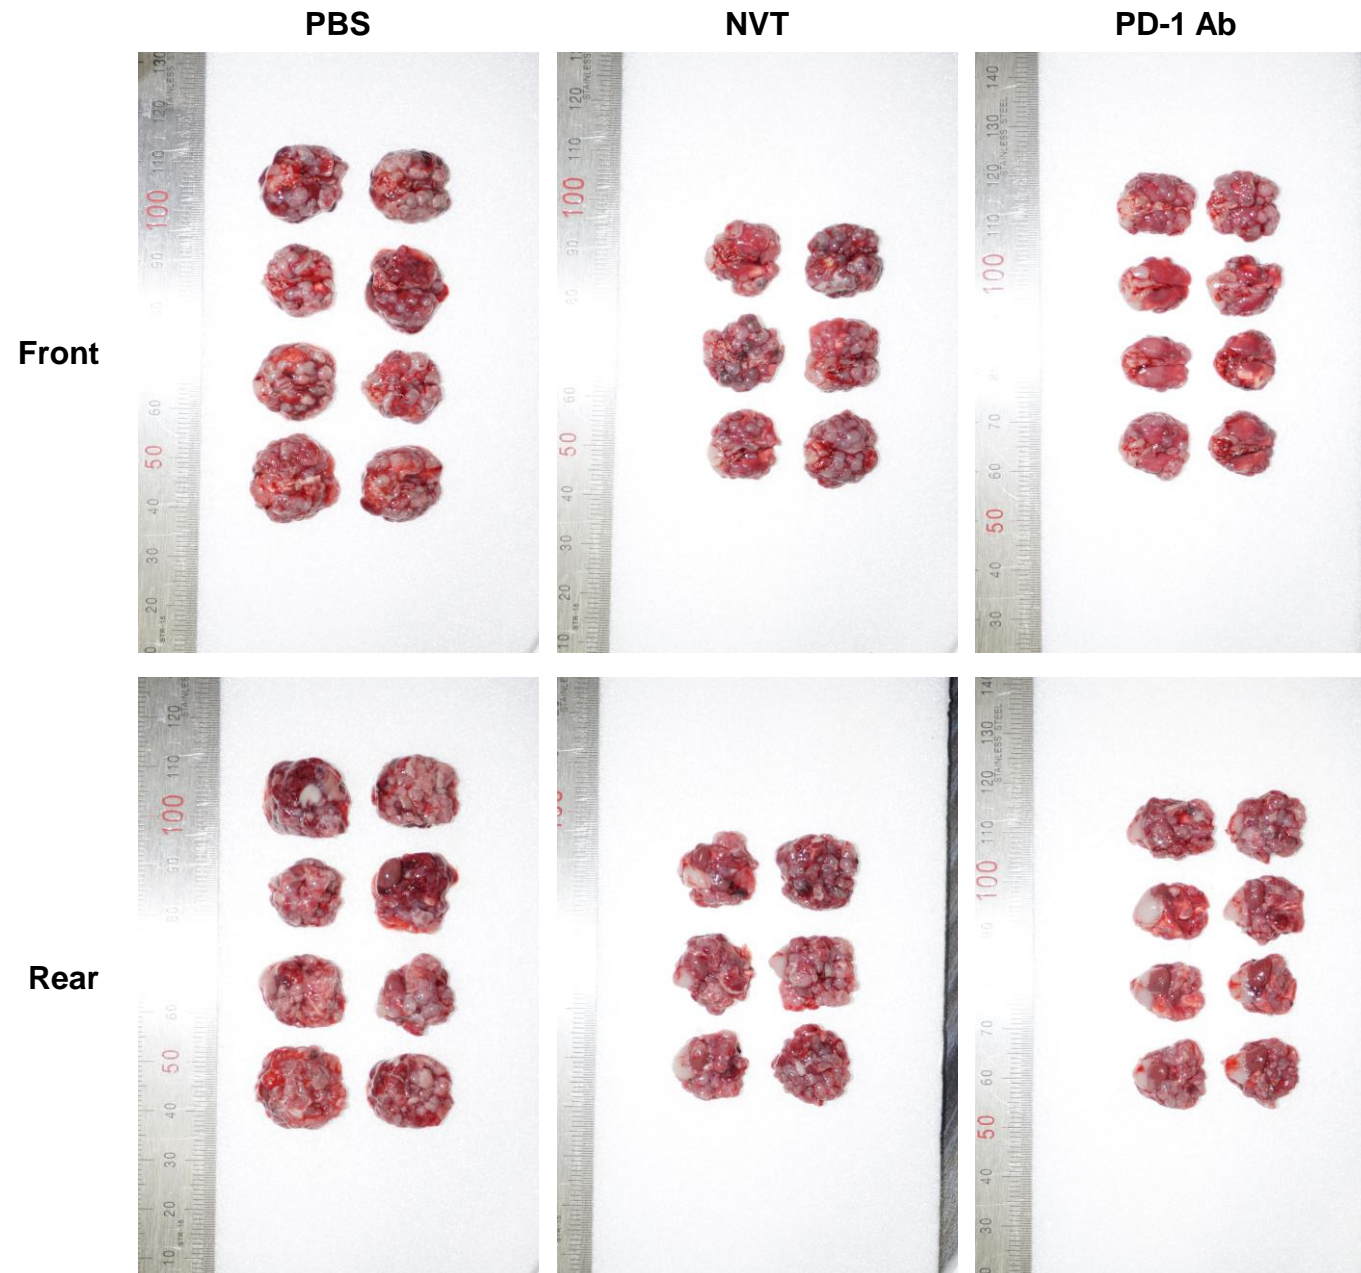



Figure 7F

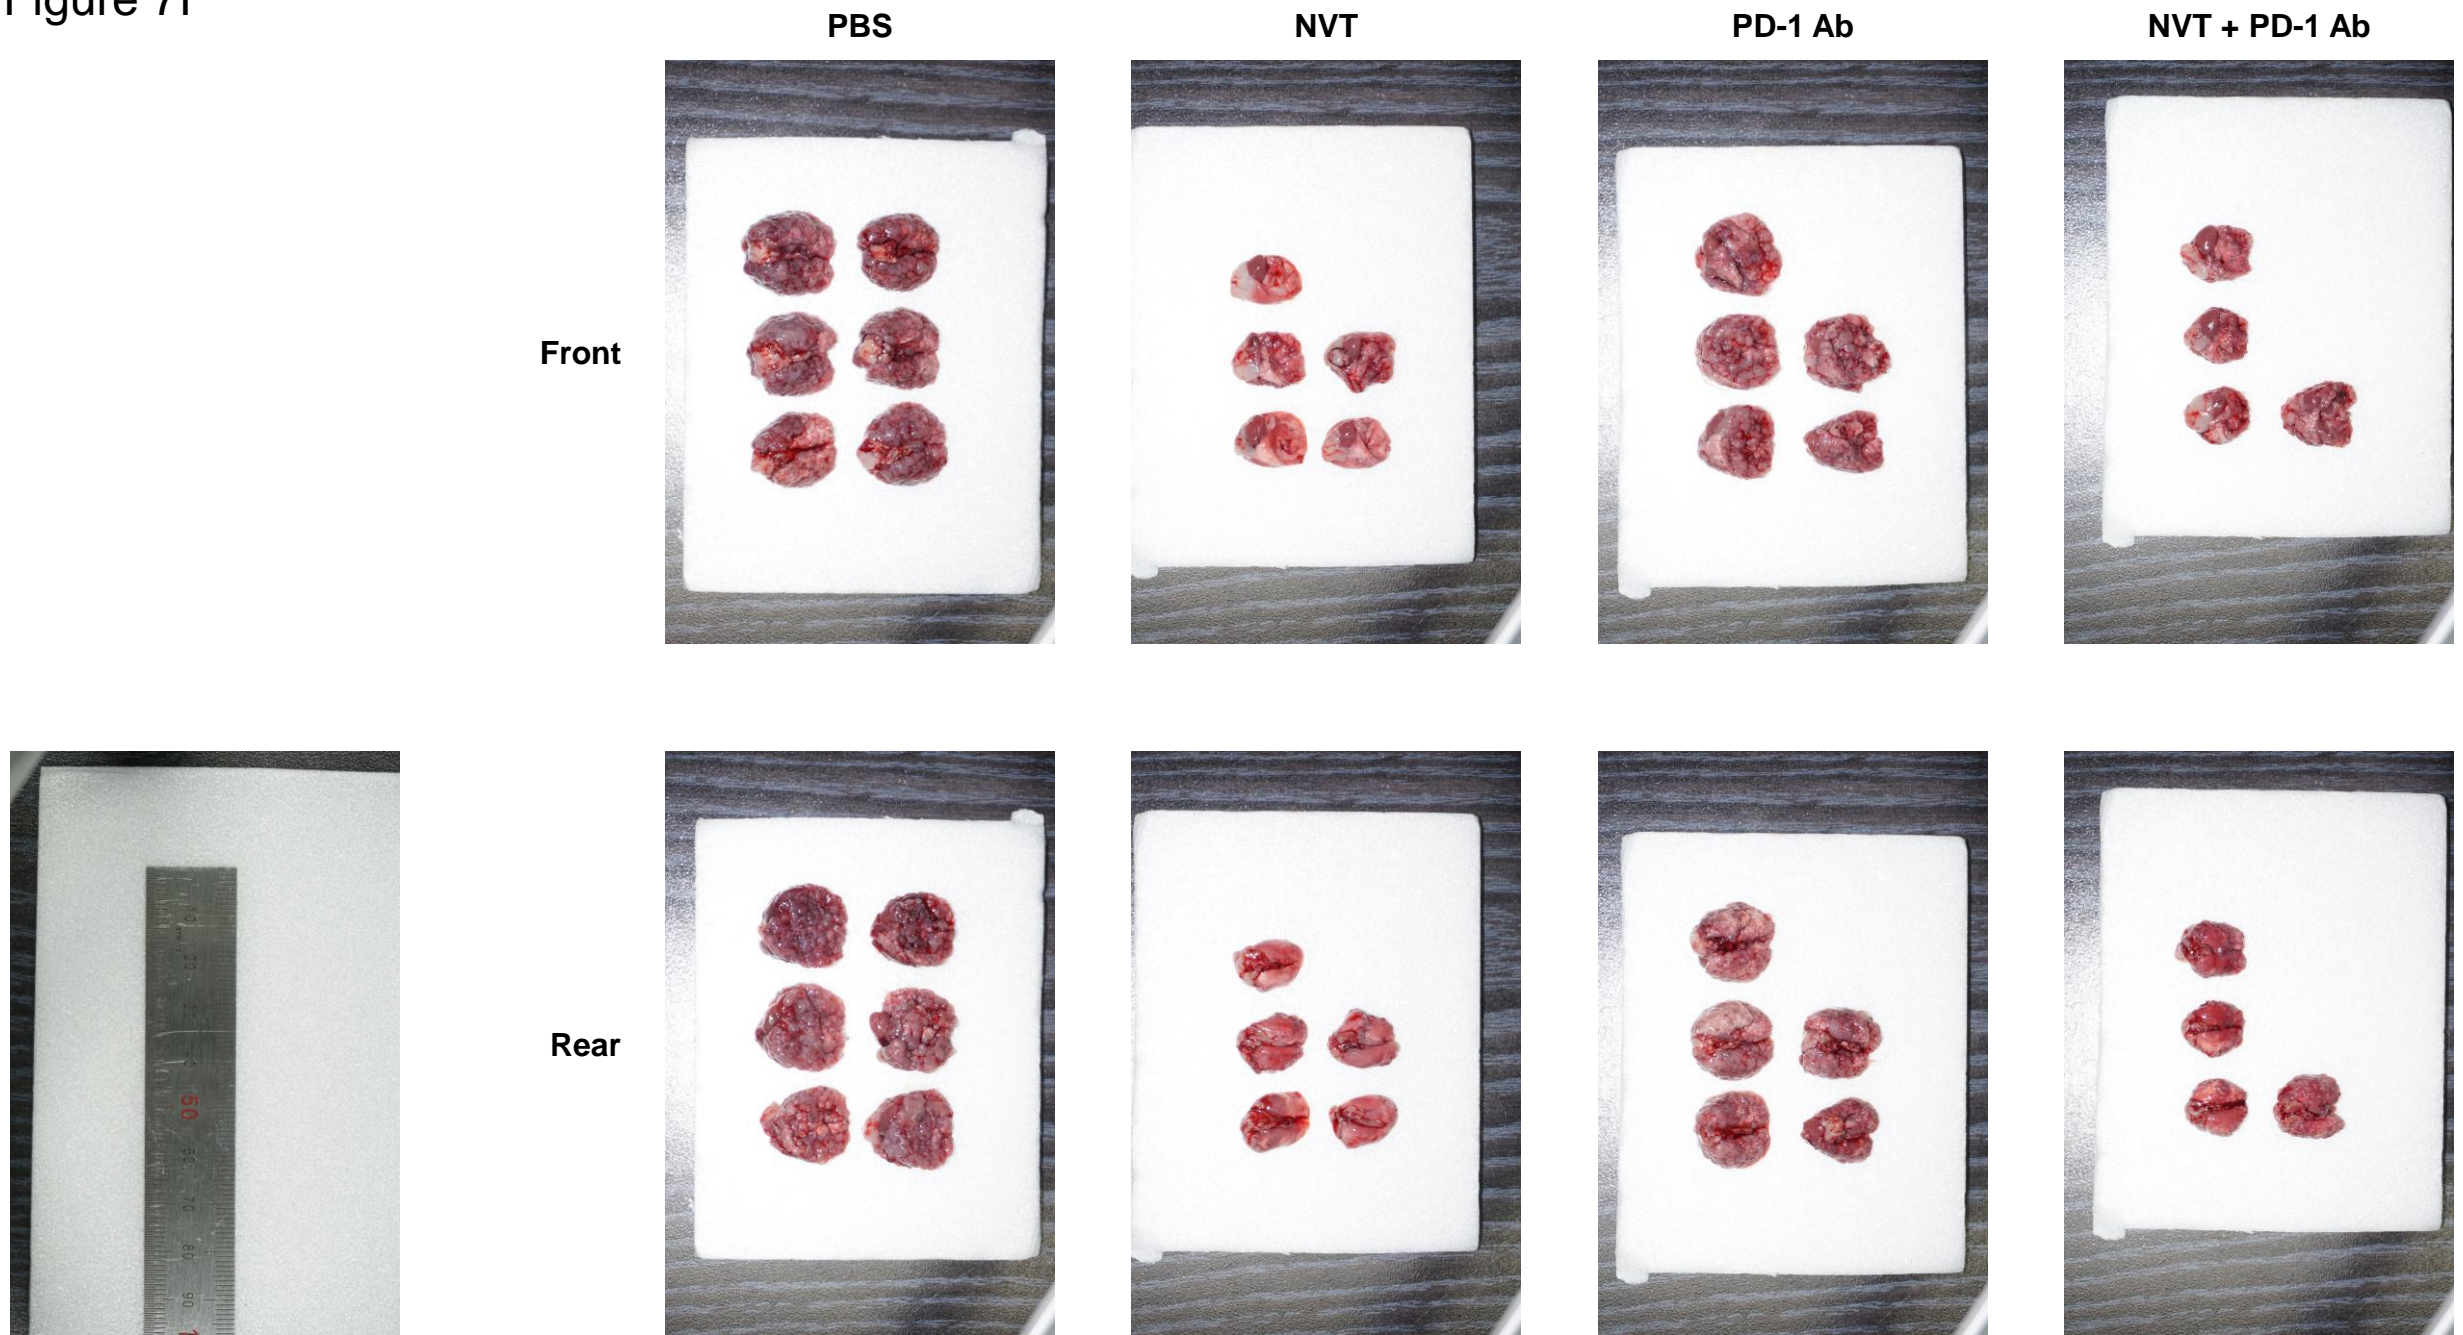

Supplement: s1 [file cancers-2710442-supplementary.pdf › cancers-2710442-supplementary.pdf]
